# Supplementary material
Source: PubMed Central journal article supplement (PMC6153047)

**Figure S1. Scatterplots of estimated glomerular filtration rate and urine albumin-to-creatinine ratio with GDF-15, galectin-3 and sST2**

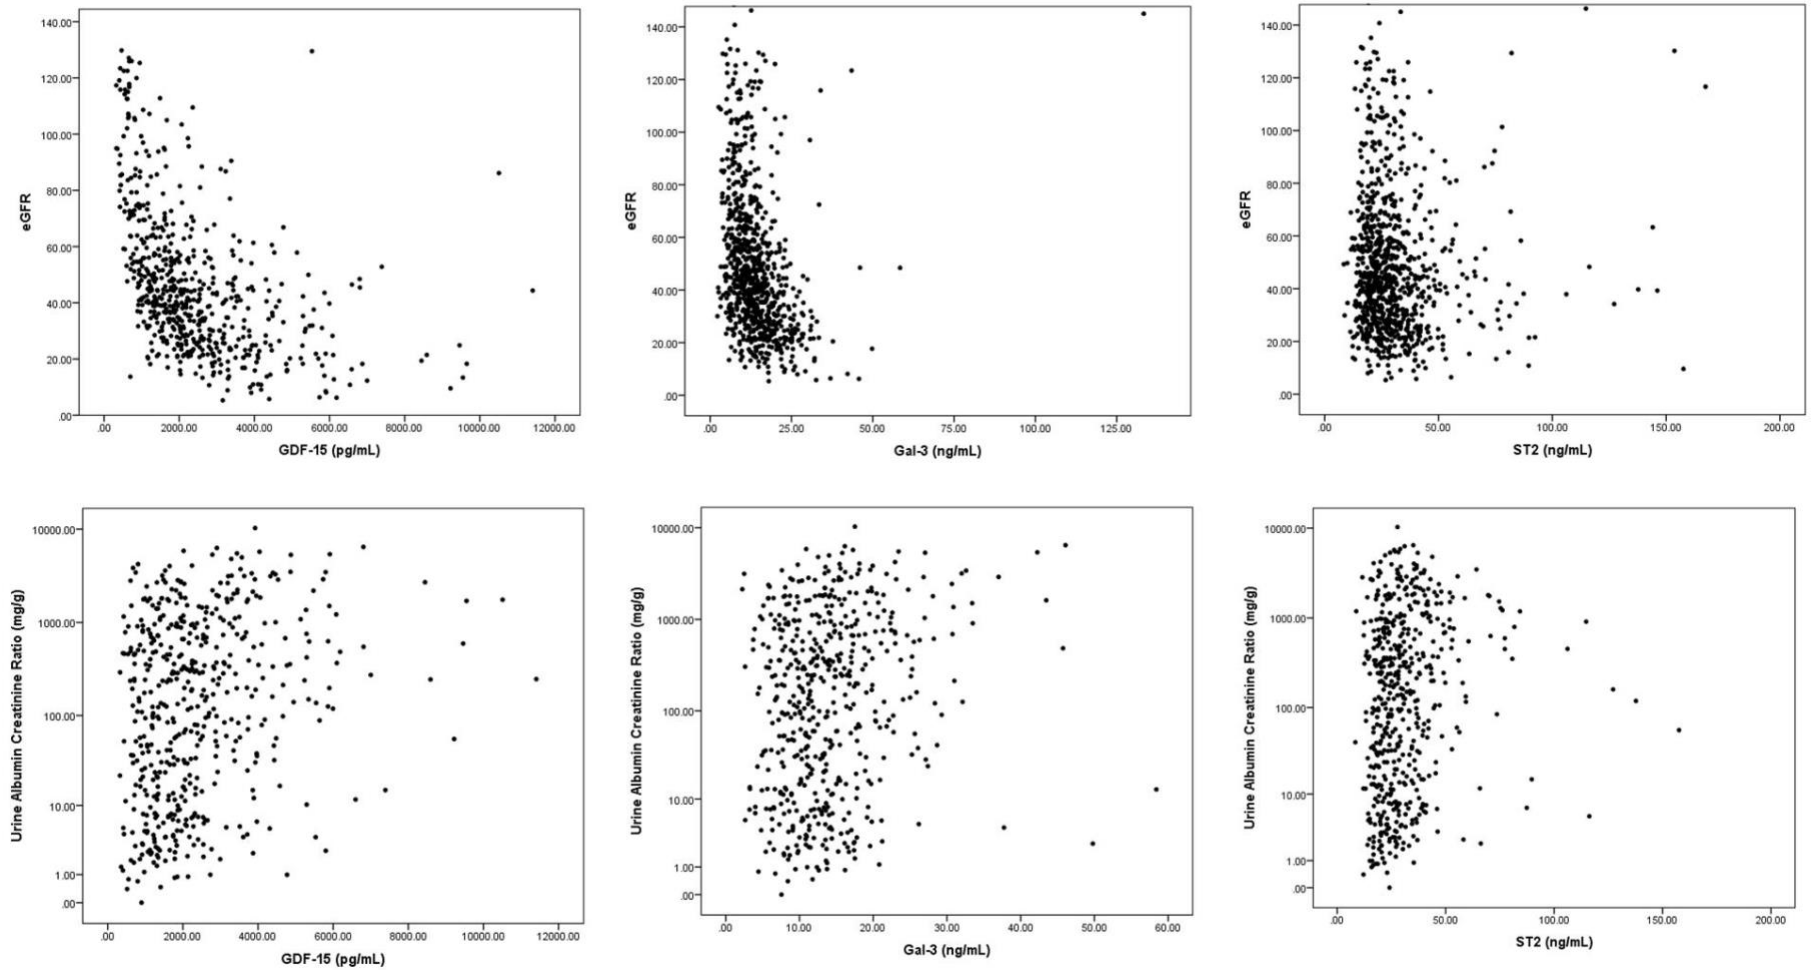

Supplement: NIHMS972480-supplement-1.pdf [file NIHMS972480-supplement-1.pdf]
