# Supplementary material
Source: PubMed Central journal article supplement (PMC6153047)

**Figure S2: Incidence rates of study outcomes (mortality, heart failure, and atherosclerotic CVD) based on GDF-15, Gal-3, and sST-2 quartiles**

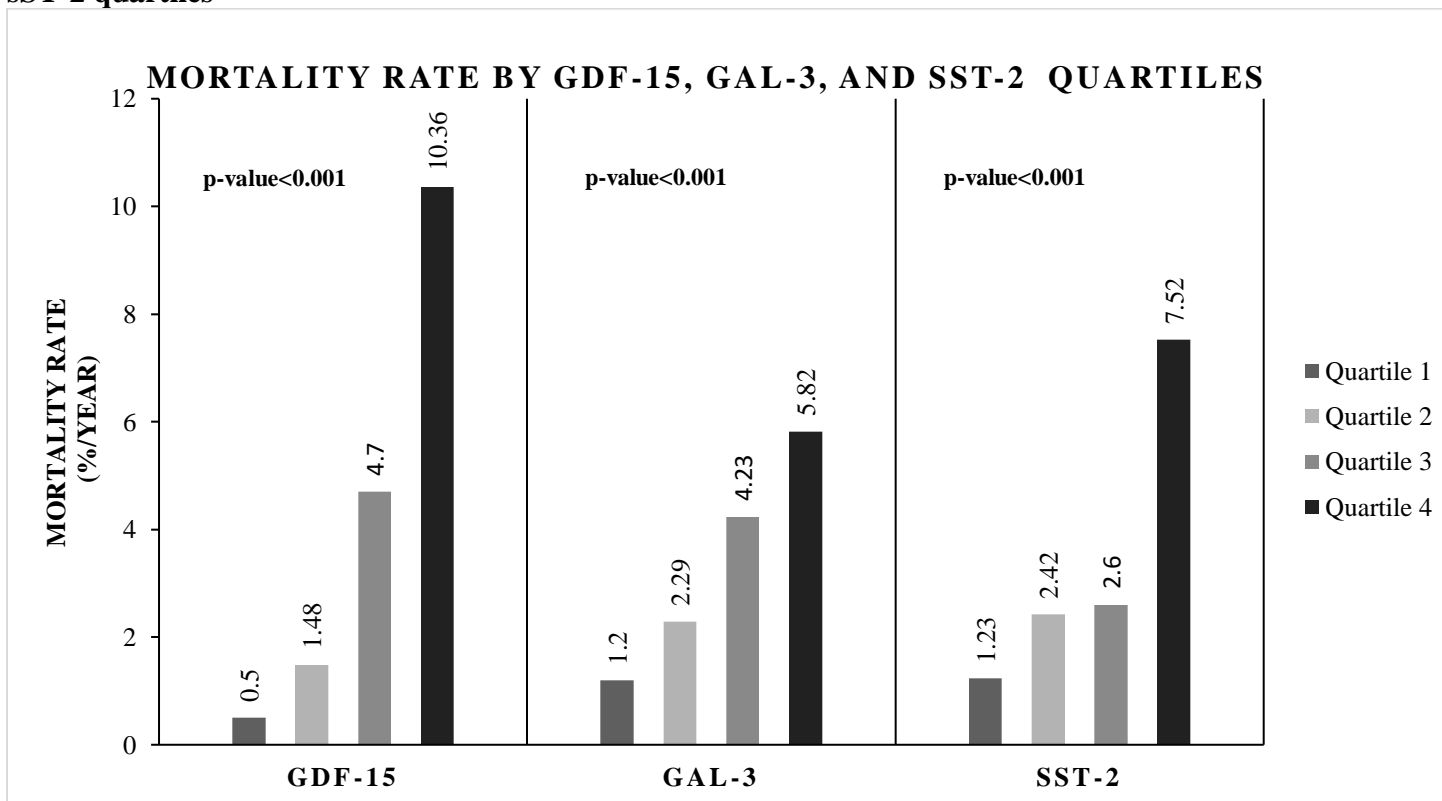

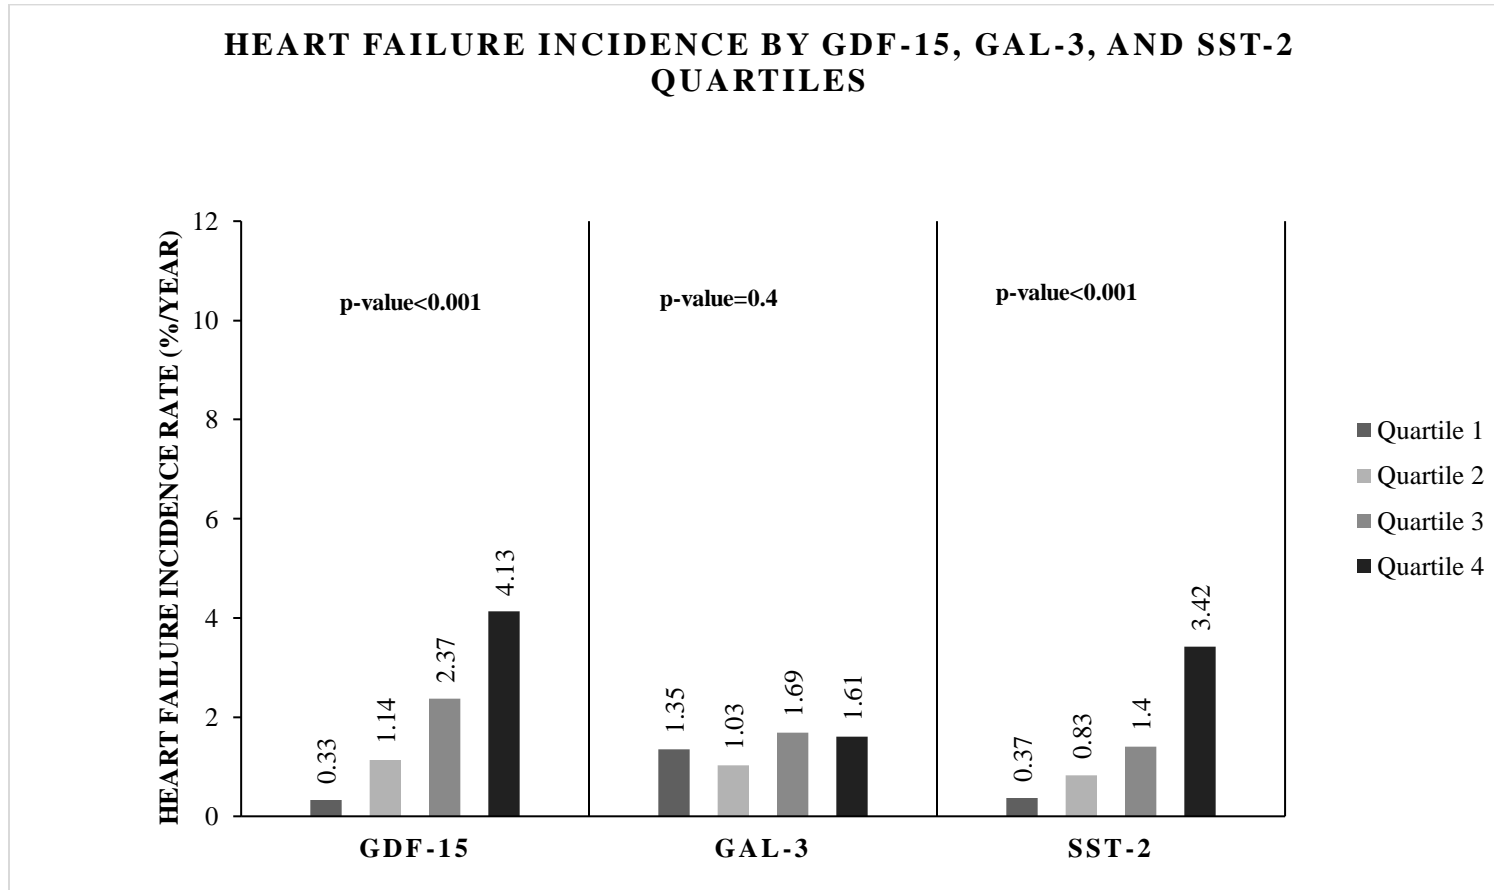

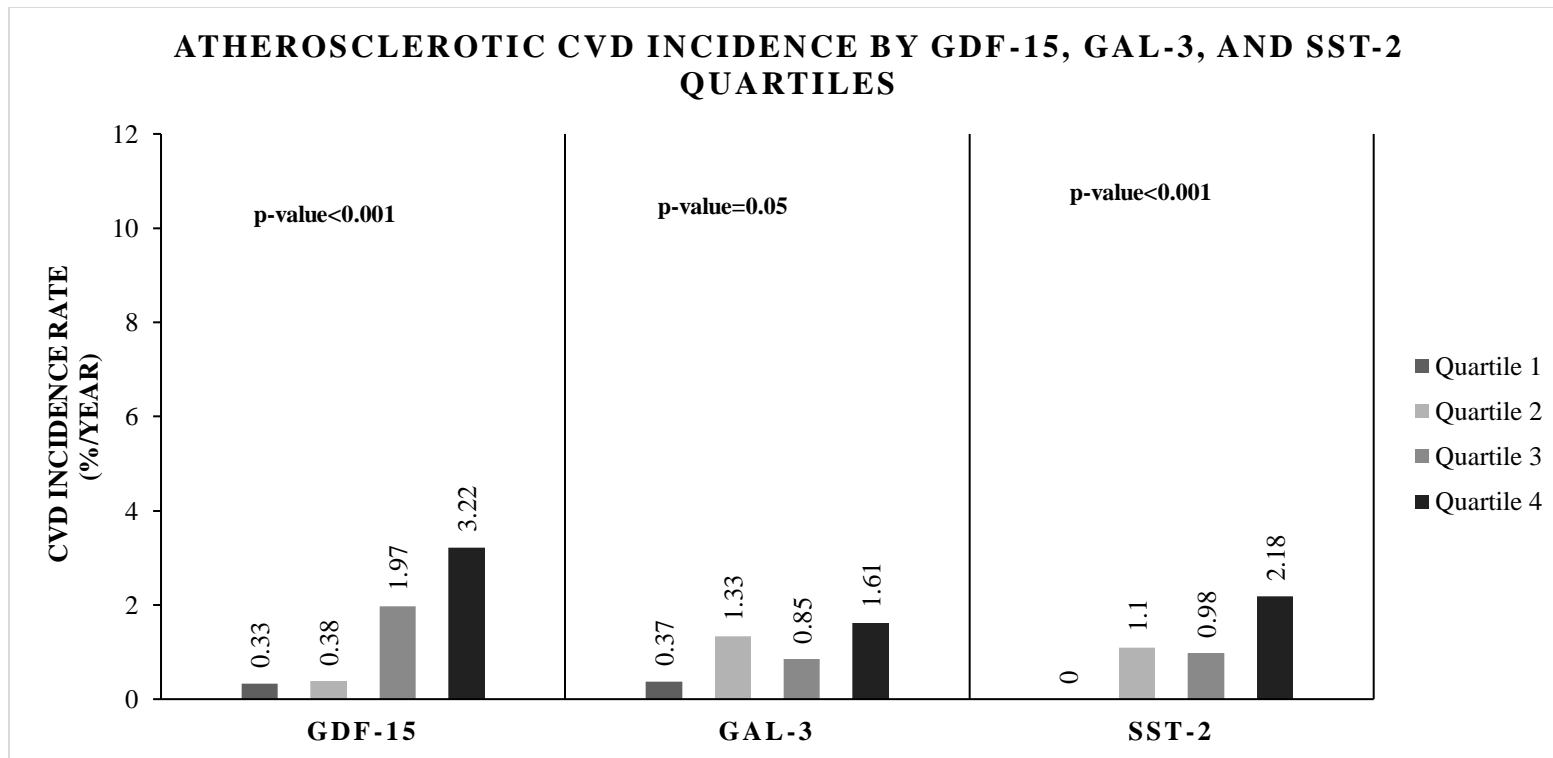

Supplement: NIHMS972480-supplement-2.pdf [file NIHMS972480-supplement-2.pdf]
