# Supplementary material
Source: PubMed Central journal article supplement (PMC6153047)
Supplement: NIHMS972480-supplement-3.pdf [file NIHMS972480-supplement-3.pdf]

**Table S1. Baseline characteristics of study population across quartiles of GDF-15, galectin-3 and sST-2**

|                                                       | GDF-15 (pg/ml) |             |               |                | Galectin-3 (ng/ml) |               |               |                | sST-2 (ng/ml) |               |               |                |
|-------------------------------------------------------|----------------|-------------|---------------|----------------|--------------------|---------------|---------------|----------------|---------------|---------------|---------------|----------------|
|                                                       | < 1280         | 1280 - 2019 | 2020 - 3063   | > 3063         | < 9.17             | 9.17 - 12.82  | 12.83 - 17.07 | > 17.07        | < 20.59       | 20.59 - 26.32 | 26.33 - 34.51 | > 34.51        |
| N                                                     | 154            | 155         | 155           | 154            | 222                | 219           | 222           | 220            | 221           | 220           | 222           | 220            |
| Age, year                                             | 48 (15)        | 58 (13)     | 64 (13)       | 64 (13)        | 52 (16)            | 58 (15)       | 59 (14)       | 61 (14)        | 57 (16)       | 56 (15)       | 57 (15)       | 59 (15)        |
| Male                                                  | 75 (49)        | 79 (51)     | 103 (67)      | 118 (77)       | 131 (59)           | 137 (63)      | 108 (49)      | 114 (52)       | 83 (38)       | 118 (54)      | 140 (63)      | 149 (68)       |
| Race                                                  |                |             |               |                |                    |               |               |                |               |               |               |                |
| White                                                 | 83 (54)        | 99 (64)     | 97 (63)       | 95 (62)        | 131 (59)           | 111 (51)      | 128 (58)      | 115 (52)       | 108 (49)      | 127 (58)      | 120 (54)      | 130 (59)       |
| Black                                                 | 60 (39)        | 44 (28)     | 47 (30)       | 36 (23)        | 68 (31)            | 85 (39)       | 70 (32)       | 80 (36)        | 88 (40)       | 78 (36)       | 72 (32)       | 65 (30)        |
| Other                                                 | 11 (7)         | 11 (7)      | 11 (7)        | 23 (15)        | 23 (10)            | 22 (10)       | 23 (10)       | 24 (11)        | 23 (10)       | 15 (7)        | 30 (14)       | 24 (11)        |
| Education                                             |                |             |               |                |                    |               |               |                |               |               |               |                |
| < High School                                         | 7 (5)          | 12 (8)      | 11 (7)        | 15 (11)        | 17 (8)             | 19 (9)        | 28 (13)       | 26 (12)        | 24 (11)       | 16 (8)        | 31 (14)       | 19 (9)         |
| completed High School                                 | 83 (55)        | 81 (55)     | 88 (59)       | 19 (64)        | 107 (51)           | 121 (57)      | 119 (55)      | 124 (58)       | 111 (51)      | 123 (59)      | 119 (54)      | 118 (57)       |
| Complete College or More                              | 61 (40)        | 54 (37)     | 51 (34)       | 37 (26)        | 88 (42)            | 74 (35)       | 68 (32)       | 63 (30)        | 83 (38)       | 70 (34)       | 69 (32)       | 71 (34)        |
| Cardiovascular Disease                                | 40 (26)        | 51 (33)     | 85 (55)       | 95 (62)        | 73 (33)            | 92 (42)       | 86 (39)       | 104 (47)       | 68 (31)       | 82 (37)       | 89 (40)       | 116 (53)       |
| Heart Failure                                         | 16 (10)        | 14 (9)      | 32 (21)       | 43 (28)        | 23 (10)            | 38 (17)       | 28 (13)       | 41 (19)        | 16 (7)        | 34 (15)       | 33 (15)       | 47 (21)        |
| Myocardial Infarction                                 | 10 (6)         | 14 (9)      | 34 (22)       | 47 (31)        | 23 (10)            | 32 (15)       | 37 (17)       | 50 (23)        | 29 (13)       | 35 (16)       | 34 (15)       | 44 (20)        |
| Ischemic Stroke                                       | 5 (3)          | 12 (8)      | 23 (15)       | 31 (20)        | 16 (7)             | 27 (12)       | 19 (9)        | 33 (15)        | 14 (6)        | 27 (12)       | 27 (12)       | 27 (12)        |
| Current Smoker                                        | 14 (9)         | 18 (12)     | 18 (12)       | 34 (24)        | 24 (11)            | 31 (15)       | 34 (16)       | 27 (13)        | 26 (12)       | 33 (15)       | 30 (14)       | 27 (13)        |
| Diabetes                                              | 40 (26)        | 65 (42)     | 83 (54)       | 91 (59)        | 69 (31)            | 89 (41)       | 97 (44)       | 122 (56)       | 74 (34)       | 88 (40)       | 96 (43)       | 119 (54)       |
| Hypertension                                          | 119 (77)       | 135 (87)    | 144 (93)      | 146 (95)       | 173 (78)           | 194 (89)      | 196 (88)      | 201 (91)       | 178 (81)      | 190 (86)      | 192 (87)      | 204 (93)       |
| HTN med use                                           | 125 (81)       | 137 (88)    | 139 (90)      | 142 (92)       | 164 (74)           | 174 (80)      | 186 (84)      | 199 (91)       | 171 (77)      | 179 (81)      | 183 (82)      | 190 (87)       |
| Systolic blood pressure, mmHg                         | 128 (17)       | 131 (20)    | 134 (20)      | 137 (21)       | 129 (17)           | 133 (21)      | 132 (20)      | 134 (21)       | 128 (16)      | 134 (22)      | 132 (18)      | 136 (21)       |
| Diastolic blood pressure, mmHG                        | 77 (12)        | 74 (10)     | 74 (12)       | 72 (13)        | 74 (11)            | 76 (12)       | 75 (12)       | 73 (13)        | 74 (11)       | 76 (12)       | 73 (12)       | 75 (13)        |
| Body mass index, kg/m2                                | 31.2 (7.8)     | 33.2 (8.5)  | 31.2 (7.6)    | 30.6 (7.0)     | 30.1 (7.3)         | 31.6 (7.8)    | 31.1 (7.1)    | 33.8 (8.7)     | 32.1 (8.3)    | 30.8 (6.9)    | 32.5 (8.4)    | 31.3 (7.7)     |
| Statins                                               | 53 (34)        | 78 (50)     | 81 (52)       | 84 (55)        | 71 (32)            | 85 (39)       | 105 (47)      | 112 (51)       | 79 (36)       | 76 (35)       | 109 (49)      | 109 (50)       |
| Estimated glomerular filtration rate, ml/min/1.73 m2  | 71 (30)        | 47 (17)     | 38 (18)       | 32 (19)        | 64 (3)             | 53 (25)       | 45 (24)       | 35 (24)        | 53 (29)       | 50 (27)       | 50 (28)       | 44 (28)        |
| Urine albumin-to-creatinine ratio, g/mg, median [IQR] | 58 [8, 472]    | 93 [9, 885] | 149 [21, 614] | 374 [84, 1764] | 92 [10, 615]       | 106 [16, 400] | 237 [16, 920] | 420 [57, 1234] | 61 [9, 463]   | 125 [15, 688] | 158 [16, 664] | 368 [48, 1445] |

All values in table are means (SD) or % (N) unless otherwise noted
