# Supplementary material
Source: PubMed Central journal article supplement (PMC6153047)
Supplement: NIHMS972480-supplement-4.pdf [file NIHMS972480-supplement-4.pdf]

**Table S2: Multivariable linear regression analysis of patient baseline characteristics and GDF-15, Gal-3, sST-2 levels**

| <i>Covariates</i>                        | <i>GDF- 15*</i>         |         | <i>Galectin-3*</i>      |         | <i>sST-2*</i>          |         |
|------------------------------------------|-------------------------|---------|-------------------------|---------|------------------------|---------|
|                                          | $\beta$ (95% CI)        | p-value | $\beta$ (95% CI)        | p-value | $\beta$ (95% CI)       | p-value |
| <i>Age</i>                               | 0.009 (0.006, 0.013)    | <0.001  | 0.000 (-0.003, 0.003)   | 0.983   | -0.002 (-0.004, 0.001) | 0.197   |
| <i>Female</i>                            | 0.105 (0.023, 0.188)    | 0.012   | -0.174 (-0.237, -0.111) | <0.001  | 0.173 (0.117, 0.230)   | <0.001  |
| <i>Black</i>                             | -0.098 (-0.183, -0.013) | 0.024   | 0.055 (-0.009, 0.120)   | 0.094   | -0.012 (-0.071, 0.046) | 0.684   |
| <i>Current Smoker</i>                    | 0.243 (0.132, 0.354)    | <0.001  | -0.002 (-0.092, 0.087)  | 0.96    | -0.010 (-0.091, 0.070) | 0.801   |
| <i>Cardiovascular Disease</i>            | 0.081 (-0.003, 0.165)   | 0.059   | -0.013 (-0.079, 0.053)  | 0.694   | 0.069 (0.010, 0.129)   | 0.023   |
| <i>Diabetes</i>                          | 0.109 (0.025, 0.192)    | 0.011   | 0.020 (-0.046, 0.085)   | 0.555   | 0.068 (0.008, 0.128)   | 0.026   |
| <i>Antihypertensive Use</i>              | -0.063 (-0.186, 0.060)  | 0.318   | 0.096 (0.013, 0.179)    | 0.024   | 0.010 (-0.066, 0.086)  | 0.799   |
| <i>Statin Use</i>                        | -0.053 (-0.136, 0.030)  | 0.212   | 0.037 (-0.029, 0.103)   | 0.27    | 0.056 (-0.004, 0.116)  | 0.066   |
| <i>Systolic Blood Pressure</i>           | -0.001 (-0.003, 0.002)  | 0.578   | 0.000 (-0.002, 0.001)   | 0.766   | 0.001 (-0.001, 0.003)  | 0.06    |
| <i>eGFR</i>                              | -0.010 (-0.012, -0.009) | <0.001  | -0.006 (-0.007, -0.005) | <0.001  | 0.001 (-0.001, 0.002)  | 0.313   |
| <i>Albumin to Creatinine Ratio (log)</i> | 0.053 (0.033, 0.074)    | <0.001  | 0.020 (0.003, 0.037)    | 0.021   | 0.018 (-0.002, 0.039)  | 0.077   |

Adjusted for all covariates in table

\* Log Transformed
